# Supplementary material for: In vivo articular cartilage deformation: noninvasive quantification of intratissue strain during joint contact in the human knee
Source: PubMed Central journal article supplement (PMC4707486; doi:10.1038/srep19220), 2016-01-11
Supplement: srep19220-s1.pdf [file srep19220-s1.pdf]

*In vivo articular cartilage deformation: noninvasive quantification of intratissue strain during joint contact in the human knee*

Deva D. Chan, Luyao Cai, Kent D. Butz, Stephen B. Trippel, Eric A. Nauman, Corey P. Neu

**SUPPLEMENTARY INFORMATION**

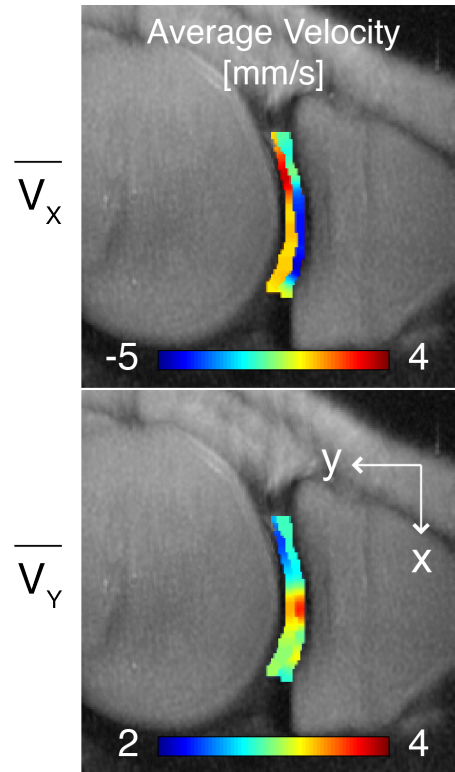

**Supplementary Figure S1. Intratissue average velocity in tibiofemoral articular cartilage.**

The average velocity at each pixel in the femoral and tibial cartilage was also computed in a representative subject using the time elapsed (mixing time) between displacement encoding and image acquisition.

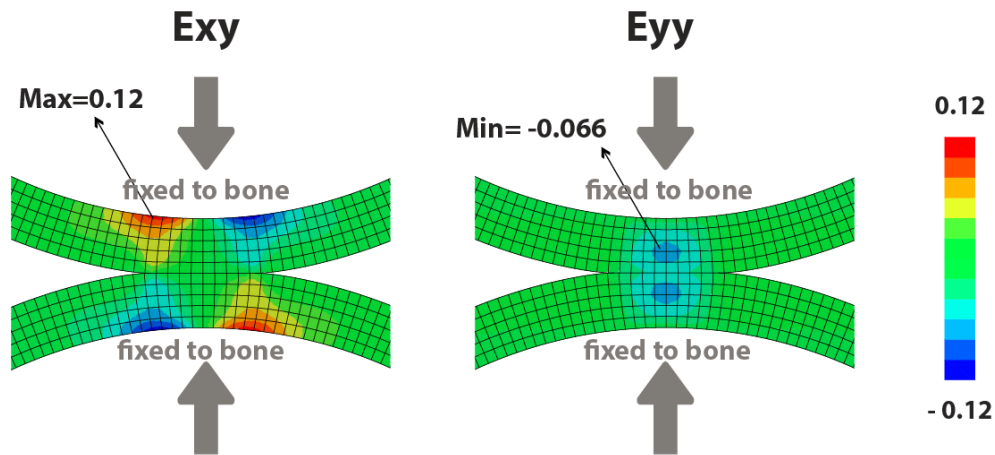

**Supplementary Figure S2.  $E_{xy}$  and  $E_{yy}$  results of an incompressible linear elastic model under axial loading.** This simple example represents femur and tibia cartilages that were fixed at their cartilage-bone interface. The result showed that the lateral extension of an incompressible cartilage can induce a larger shear deformation compared to axial deformation.
